# Supplementary material
Source: Springer Nature journal article supplement (http://www.springermedizin.de/resource/supplementary/13049_2009_53_MOESM15_ESM.pdf/9665786)

R CHEST

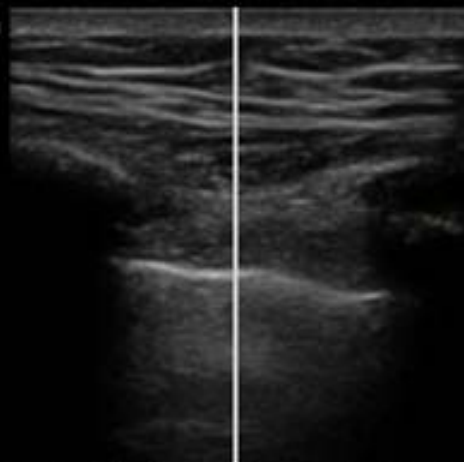

3.8

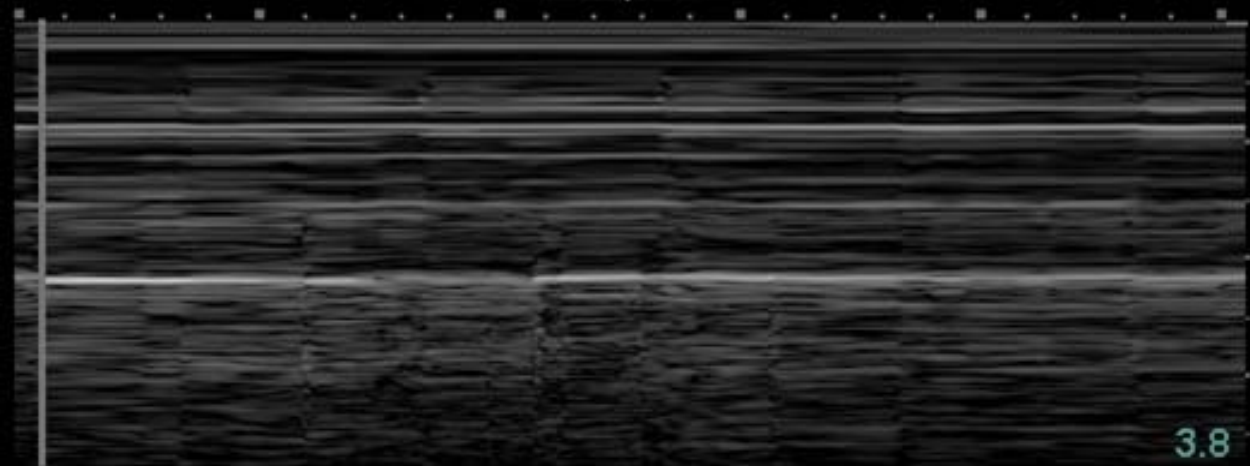

3.8

Supplement: MOESM15 [file 9665786]
